# Supplementary material for: No evidence for tephra in Greenland from the historic eruption of Vesuvius in 79 CE: Implications for geochronology and paleoclimatology
Source: Copernicus journal article supplement (doi:10.5194/cp-2021-63), 2021-06-16
Supplement: Supplementary file 1 [file Dataset 1.xlsx]

## Sheet: READ_ME
Supplementary Data for
No evidence for tephra in Greenland from the historic eruption of Vesuvius in 79 CE: Implications for geochronology and paleoclimatology
Gill Plunkett, Michael Sigl, Hans Schwaiger, Emma Tomlinson, Matthew Toohey, Joseph R. McConnell, Jonathan R. Pilcher, Takeshi Hasegawa and Claus Siebe
Submitted to Climate of the Past
This file contains the geochemical datasets for previously unpublished tephras discussed in this paper.
1) Major element geochemical analyses of glass shards from QUB-1832/3 (NEEM-2011-S1 ice core)
2) Major element geochemical analyses of glass shards from OSC1-5 (Paramushir Island)*
3) Major element geochemical analyses of glass from Popocatepetl reference samples (Pink Pumice, Lorenzo Pumice, NMNH-107955, NMNH-107956-1, NMNH-117624-15, NMNH-117624-16)*
4) Secondary glass standard data and reference values (Kuehn et al., 2011) associated with major element geochemical analyses
5) LA-ICP-MS trace element analyses of glass shards from QUB-1832/3, QUB1859 and Popocatepetl references samples (NMNH-107955, NMNH-107956-1, NMNH-117624-15, NMNH-117624-16)
6) Secondary glass standard data and reference values (GeoReM) associated with trace element geochemical analyses
*For sample details, refer to Supplementary Information
Major element geochemical analyses were performed using a JEOL FEGSEM 6500F INCAWAVE followed the parameters outlined by Coulter et al. (2009), with the addition of Cl which was standardized using tugtupite and analyzed using WDS (count time 30 s; background 10 s) or with EDS, and P which was standardized using apatite and analyzed using WDS (count time 30 s; background 10 s). Operating condition…
Trace elements were determined via laser ablation ICPMS using a Teledyne Photon Machines G2 193nm eximer laser with a Helix 2-volume cell coupled to a ThermoFisher iCAPq mass spectrometer. We used a spot size of 20 microns, a repetition rate of 8Hz and a count time of 35 seconds on the sample and 30 seconds on the background. Concentrations were calibrated using NIST612 with 29Si as the internal …
References
Coulter, S. E., Pilcher, J. R., Hall, V. A., Plunkett, G., and Davies, S. M.: Testing the reliability of the JEOL FEGSEM 6500F electron microprobe for quantitative major element analysis of glass shards from rhyolitic tephra, Boreas, 39, 163-169, doi:10.1111/j.1502-3885.2009.00113.x, 2009.
Kuehn S. C., Froese D. G., and Shane P. A. R.: The INTAV intercomparison of electron-beam microanalysis of glass by tephrochronology laboratories, results and recommendations, Quaternary Int., 246, 19-47, https://doi.org/10.1016/j.quaint.2011.08.022, 2011.
Tomlinson, E. L., Thordarson, T., Mueller, W., Thirlwall, M., and Menzies, M.A.: Microanalysis of tephra by LA-ICP-MS - Strategies, advantages and limitations assessed using the Thorsmork ignimbrite (Southern Iceland), Chem. Geol., 279, 73-89, https://doi.org/10.1016/j.chemgeo.2010.09.013, 2010.

## Sheet: QUB1832-3 majors
Sample	Point	SiO2	TiO2	Al2O3	FeOt	MnO	MgO	CaO	Na2O	K2O	P2O5	Cl	Analytical total		Date of analysis		SiO2	TiO2	Al2O3	FeOt	MnO	MgO	CaO	Na2O	K2O	P2O5	Cl	Analytical total
		wt%	wt%	wt%	wt%	wt%	wt%	wt%	wt%	wt%	wt%	wt%	wt%				wt%	wt%	wt%	wt%	wt%	wt%	wt%	wt%	wt%	wt%	wt%	wt%
		ORIGINAL DATA															NORMALISED DATA
QUB-1833	Shard #1	57.42	1.11	15.06	7.24	0.17	2.45	5.41	4.24	1.76	0.17	0.17	95.2		2013-07-10		60.423	1.16805	15.8476	7.61865	0.178891	2.57813	5.69294	4.46175	1.85205	0.178891	0.178891	95.2
QUB-1833	Shard #2	62.11	1.04	16.26	7.68	0.22	2.29	5.85	3.84	1.81	0.16	0.19	101.46		2013-07-10		61.3311	1.02696	16.0561	7.58369	0.217241	2.26128	5.77664	3.79184	1.7873	0.157993	0.187617	101.46
QUB-1833	Shard #3	57.18	1.13	15.87	8.41	0.13	2.84	6.84	4.18	1.57	0.17	0.16	98.47		2013-07-10		58.163	1.14943	16.1428	8.55457	0.132235	2.88882	6.95758	4.25186	1.59699	0.172922	0.16275	98.47
QUB-1832	Shard #6b	58.7	1.08	15.69	7.22	0.08	2.46	5.64	3.98	1.73	-	0.11	96.7		2013-08-07		60.7723	1.11813	16.2439	7.47489	0.0828243	2.54685	5.83911	4.12051	1.79108	-	0.113883	96.7
QUB-1832	Shard #6b	58.54	1.13	15.54	7.08	0.15	2.4	5.83	4.3	1.73	-	0.12	96.81		2013-08-07		60.544	1.16868	16.072	7.32237	0.155135	2.48216	6.02958	4.4472	1.78922	-	0.124108	96.81
QUB-1832	Shard #2b	57.83	1.16	15.16	7.65	0.06	2.62	5.81	3.74	1.75	-	0.16	95.95		2013-08-07		60.3716	1.21098	15.8263	7.98622	0.062637	2.73515	6.06535	3.90437	1.82691	-	0.167032	95.95
QUB-1832	Shard #3	57.91	1.21	15.47	7.86	-	2.57	6	3.67	1.64	-	0.16	96.48		2013-08-07		60.1225	1.25623	16.061	8.1603	0	2.66819	6.22924	3.81022	1.70266	-	0.166113	96.48
QUB-1832	Shard #1	57.76	1.07	15.68	7.4	0.06	2.63	5.89	4.22	1.65	-	0.11	96.47		2013-08-07		59.9419	1.11042	16.2723	7.67954	0.0622665	2.72935	6.11249	4.37941	1.71233	-	0.114155	96.47
QUB-1832	Shard #2	56.72	1.11	15.14	7.78	0.14	2.7	5.98	4.16	1.73	-	0.15	95.61		2013-08-07		59.4176	1.16279	15.86	8.15001	0.146658	2.82841	6.2644	4.35785	1.81228	-	0.157134	95.61
QUB-1832	Shard #6b	59.48	0.93	16.28	7.09	0.18	2.42	5.99	4.14	1.74	0.14	0.08	98.47		2018-11-30		60.4042	0.94445	16.533	7.20016	0.182797	2.4576	6.08307	4.20433	1.76704	0.142175	0.081243	98.47
QUB-1832	Shard #1b	58.82	1.02	16.16	7.68	0.13	2.51	6.2	3.96	1.66	0.24	0.1	98.47		2018-11-30		59.7339	1.03585	16.4111	7.79933	0.13202	2.549	6.29633	4.02153	1.68579	0.243729	0.101554	98.47
QUB-1832	Shard #2c	59.74	0.92	16.27	7.61	0.3	2.5	6.03	5.37	1.68	0.19	0.13	100.72		2018-11-30		59.3129	0.913423	16.1537	7.5556	0.297855	2.48213	5.98689	5.33161	1.66799	0.188642	0.129071	100.72
QUB-1832	Shard #5	56.1	1.07	15.29	7.3	0.25	2.52	5.95	4.32	1.57	0.28	0.17	94.8		2018-11-30		59.1772	1.12869	16.1287	7.70042	0.263713	2.65823	6.27637	4.55696	1.65612	0.295359	0.179325	94.8
QUB-1832	Shard #6b	58.29	0.97	16	7.77	0.21	2.71	6.22	4.41	1.68	0.28	0.13	98.68		2018-11-30		59.0697	0.982975	16.214	7.87394	0.212809	2.74625	6.3032	4.46899	1.70247	0.283745	0.131739	98.68
QUB-1832	Shard #2d	57.64	1.16	16.24	8.37	0.26	2.99	6.45	4.28	1.54	0.35	0.13	99.41		2018-11-30		57.9821	1.16688	16.3364	8.41968	0.261543	3.00775	6.48828	4.3054	1.54914	0.352077	0.130772	99.41
QUB-1832	Shard #4	57.62	1.18	16.43	7.88	0.29	2.95	7.04	4.64	1.23	0.29	0.1	99.65		2018-11-30		57.8224	1.18414	16.4877	7.90768	0.291019	2.96036	7.06473	4.6563	1.23432	0.291019	0.100351	99.65

## Sheet: OSC1-5 majors
Sample	Point	SiO2	TiO2	Al2O3	FeOt	MnO	MgO	CaO	Na2O	K2O	P2O5	Cl	Analytical total		Date of analysis		SiO2	TiO2	Al2O3	FeOt	MnO	MgO	CaO	Na2O	K2O	P2O5	Cl	Analytical total
		wt%	wt%	wt%	wt%	wt%	wt%	wt%	wt%	wt%	wt%	wt%	wt%				wt%	wt%	wt%	wt%	wt%	wt%	wt%	wt%	wt%	wt%	wt%	wt%
		ORIGINAL DATA															NORMALISED DATA
OSC1-5	#1	71.14	0.45	13.04	3.45	0.11	0.64	3.06	3.82	1.56	0.13	0.16	97.56		2018-03-27		72.9192	0.461255	13.3661	3.53629	0.112751	0.656007	3.13653	3.91554	1.59902	0.133251	0.164002	97.56
OSC1-5	#2	56.66	1.44	12.97	10.41	0.24	2.25	5.99	2.93	1.73	0.36	0.19	95.17		2018-03-27		59.5356	1.51308	13.6282	10.9383	0.25218	2.36419	6.294	3.0787	1.8178	0.37827	0.199643	95.17
OSC1-5	#3	56.67	1.52	12.36	10.55	0.36	2.75	5.95	2.89	1.67	0.4	0.18	95.31		2018-03-27		59.4586	1.5948	12.9682	11.0691	0.377715	2.88532	6.24279	3.03221	1.75218	0.419683	0.188857	95.31
OSC1-5	#4	57.33	1.27	13.73	10.06	0.3	2.04	6.29	3.3	1.74	0.23	0.19	96.46		2018-03-27		59.434	1.31661	14.2339	10.4292	0.31101	2.11487	6.52084	3.42111	1.80386	0.238441	0.196973	96.46
OSC1-5	#5	57.07	1.24	13.93	9.38	0.25	2.43	6.49	3.18	1.57	0.29	0.2	96.04		2018-03-27		59.4232	1.29113	14.5044	9.76676	0.260308	2.5302	6.7576	3.31112	1.63474	0.301958	0.208247	96.04
OSC1-5	#6	58.16	1.36	14.05	9.82	0.29	2.16	6.38	3.55	1.69	0.27	0.17	97.89		2018-03-27		59.4136	1.38931	14.3528	10.0317	0.296251	2.20656	6.51752	3.62652	1.72643	0.27582	0.173664	97.89
OSC1-5	#7	56.87	1.36	13	10.46	0.29	2.71	5.95	2.93	1.68	0.35	0.19	95.77		2018-03-27		59.3819	1.42007	13.5742	10.922	0.302809	2.8297	6.2128	3.05941	1.7542	0.365459	0.198392	95.77
OSC1-5	#8	57.34	1.32	13.86	10.19	0.13	2.2	6.45	3.18	1.66	0.27	0.16	96.75		2018-03-27		59.2661	1.36434	14.3256	10.5323	0.134367	2.2739	6.66667	3.28682	1.71576	0.27907	0.165375	96.75
OSC1-5	#9	57.23	1.26	14.54	9.19	0.29	1.99	6.5	3.13	1.7	0.54	0.22	96.59		2018-03-27		59.2504	1.30448	15.0533	9.51444	0.300238	2.06025	6.72948	3.2405	1.76002	0.559064	0.227767	96.59
OSC1-5	#10	57.67	1.17	15.17	8.88	0.18	1.83	6.43	3.87	1.65	0.42	0.19	97.46		2018-03-27		59.173	1.20049	15.5654	9.11143	0.184691	1.87769	6.59758	3.97086	1.693	0.430946	0.194952	97.46
OSC1-5	#11	54.9	1.22	13.26	9.68	0.3	3.11	6.47	3.32	1.43	0.36	0.15	94.19		2018-03-27		58.2864	1.29525	14.0779	10.2771	0.318505	3.30184	6.86909	3.52479	1.51821	0.382206	0.159253	94.19
OSC1-5	#12	56.17	1.2	14.49	9.97	0.22	2.76	6.35	3.45	1.49	0.27	0.18	96.54		2018-03-27		58.1831	1.24301	15.0093	10.3273	0.227885	2.85892	6.57758	3.57365	1.5434	0.279677	0.186451	96.54
OSC1-5	#13	54.56	0.96	16.54	7.56	0.14	2.04	7.35	3.51	1.16	0.24	0.15	94.2		2018-03-27		57.9193	1.01911	17.5584	8.02548	0.14862	2.16561	7.80255	3.72611	1.23142	0.254777	0.159236	94.2
OSC1-5	#14	55.6	0.8	18.56	6.97	0.3	1.56	8.18	4.24	1.11	0.1	0.13	97.55		2018-03-27		56.9964	0.820092	19.0261	7.14505	0.307535	1.59918	8.38544	4.34649	1.13788	0.102512	0.133265	97.55

## Sheet: Popocatepetl majors
Sample	Point	SiO2	TiO2	Al2O3	FeOt	MnO	MgO	CaO	Na2O	K2O	P2O5	Cl	Analytical total		Date of analysis		SiO2	TiO2	Al2O3	FeOt	MnO	MgO	CaO	Na2O	K2O	P2O5	Cl	Analytical total
		wt%	wt%	wt%	wt%	wt%	wt%	wt%	wt%	wt%	wt%	wt%	wt%				wt%	wt%	wt%	wt%	wt%	wt%	wt%	wt%	wt%	wt%	wt%	wt%
		ORIGINAL DATA															NORMALISED DATA
Lorenzo Pumice	#1	68.93	0.7	15.29	3.13	0.05	0.49	2.82	4.65	2.55	0.22	0.11	98.93		2019-04-18		69.6755	0.707571	15.4554	3.16385	0.0505408	0.4953	2.8505	4.70029	2.57758	0.222379	0.11119	98.93
Lorenzo Pumice	#2	68.6	0.76	15.24	3.3	0.08	0.62	2.93	4.23	2.41	0.23	0.1	98.5		2019-04-18		69.6447	0.771574	15.4721	3.35025	0.0812183	0.629442	2.97462	4.29442	2.4467	0.233503	0.101523	98.5
Lorenzo Pumice	#3	69.31	0.72	15.14	3.53	-0.06	0.7	2.92	4.6	2.49	0.19	0.12	99.65		2019-04-18		69.5534	0.722529	15.1932	3.5424	-0.0602107	0.702459	2.93026	4.61616	2.49875	0.190667	0.120421	99.65
Lorenzo Pumice	#4	65.91	0.56	17.2	2.4	0	0.52	4.17	5.43	1.95	0.21	0.11	98.46		2019-04-18		66.9409	0.568759	17.469	2.43754	0	0.528133	4.23522	5.51493	1.9805	0.213285	0.11172	98.46
Lorenzo Pumice	#5	65.35	1.03	15.97	3.78	0.09	1.45	3.46	4.22	2.51	0.12	0.08	98.05		2019-04-18		66.6497	1.05048	16.2876	3.85518	0.0917899	1.47884	3.52881	4.30393	2.55992	0.122387	0.081591	98.05
Lorenzo Pumice	#6	65.73	1.06	15.97	3.52	0.03	1.4	3.62	4.53	2.53	0.16	0.07	98.64		2019-04-18		66.6363	1.07461	16.1902	3.56853	0.0304136	1.4193	3.66991	4.59246	2.56488	0.162206	0.0709651	98.64
Lorenzo Pumice	#7	65.35	1.03	15.93	3.55	0.03	1.33	3.67	4.58	2.45	0.23	0.1	98.24		2019-04-18		66.5208	1.04845	16.2154	3.6136	0.0305375	1.35383	3.73575	4.66205	2.49389	0.234121	0.101792	98.24
Lorenzo Pumice	#8	65.01	1.04	16.11	3.34	0.11	1.41	3.34	4.6	2.53	0.35	0.14	97.99		2019-04-18		66.3435	1.06133	16.4405	3.40851	0.112256	1.43892	3.40851	4.69436	2.5819	0.357179	0.142872	97.99
Lorenzo Pumice	#9	64.97	0.96	15.69	3.74	0.08	1.43	3.65	4.64	2.49	0.24	0.08	97.97		2019-04-18		66.3162	0.979892	16.0151	3.8175	0.0816577	1.45963	3.72563	4.73614	2.54159	0.244973	0.0816577	97.97
Lorenzo Pumice	#10	65.55	0.97	15.9	3.77	0.12	1.44	3.71	4.61	2.51	0.3	0.14	99.01		2019-04-18		66.2054	0.979699	16.059	3.8077	0.1212	1.4544	3.7471	4.6561	2.5351	0.303	0.1414	99.01
Lorenzo Pumice	#11	65.01	1.04	15.7	3.89	0.1	1.37	3.71	4.49	2.47	0.31	0.14	98.23		2019-04-18		66.1814	1.05874	15.9829	3.96009	0.101802	1.39469	3.77685	4.57091	2.51451	0.315586	0.142523	98.23
Lorenzo Pumice	#12	65.14	1.07	15.94	3.84	0.03	1.49	3.78	4.58	2.47	0.32	0.11	98.78		2019-04-18		65.9445	1.08322	16.1369	3.88743	0.0303705	1.5084	3.82669	4.63657	2.50051	0.323952	0.111359	98.78
Lorenzo Pumice	#13	60.94	0.97	14.9	3.64	0.08	1.38	3.54	4.24	2.31	0.38	0.15	92.54		2019-04-18		65.8526	1.0482	16.1011	3.93343	0.0864491	1.49125	3.82537	4.5818	2.49622	0.410633	0.162092	92.54
Lorenzo Pumice	#14	65.83	1.05	16.05	3.77	0.13	1.4	3.75	5.2	2.56	0.14	0.09	99.98		2019-04-18		65.8432	1.05021	16.0532	3.77075	0.130026	1.40028	3.75075	5.20104	2.56051	0.140028	0.090018	99.98
Pink Pumice	#1	67.41	0.87	15.22	3.18	0.08	0.96	3.06	4.25	3.23	0.11	0.11	98.48		2019-04-18		68.4504	0.883428	15.4549	3.22908	0.0812348	0.974817	3.10723	4.3156	3.27985	0.111698	0.111698	98.48
Pink Pumice	#2	66.09	0.74	15.44	2.96	0.01	1.09	2.79	4.44	3.11	0.24	0.15	97.05		2019-04-18		68.0989	0.762494	15.9093	3.04997	0.010304	1.12313	2.87481	4.57496	3.20453	0.247295	0.15456	97.05
Pink Pumice	#3	66.64	0.79	15.29	3.12	0.1	1.01	2.83	4.61	3.18	0.24	0.14	97.95		2019-04-18		68.0347	0.806534	15.61	3.1853	0.102093	1.03114	2.88923	4.70648	3.24655	0.245023	0.14293	97.95
Pink Pumice	#4	67.95	0.82	15.86	3.3	0.03	1.05	3.27	4.21	3.13	0.2	0.11	99.93		2019-04-18		67.9976	0.820574	15.8711	3.30231	0.030021	1.05074	3.27229	4.21295	3.13219	0.20014	0.110077	99.93
Pink Pumice	#5	67.23	0.74	15.66	3.28	-0.03	1.07	3.07	4.52	3.06	0.2	0.14	98.94		2019-04-18		67.9503	0.747928	15.8278	3.31514	-0.0303214	1.08146	3.10289	4.56843	3.09278	0.202143	0.1415	98.94
Pink Pumice	#6	67.51	0.76	15.99	3.14	0.15	1.05	3.27	4.24	2.97	0.21	0.13	99.41		2019-04-18		67.9107	0.764511	16.0849	3.15864	0.15089	1.05623	3.28941	4.26516	2.98763	0.211246	0.130772	99.41
Pink Pumice	#7	68.14	0.76	15.9	3.35	-0.01	1.02	3.04	4.75	3.07	0.2	0.13	100.34		2019-04-18		67.9091	0.757425	15.8461	3.33865	-0.00996612	1.01654	3.0297	4.7339	3.0596	0.199322	0.129559	100.34
Pink Pumice	#8	66.88	0.75	15.56	3.31	0.03	1.08	3.12	4.55	3	0.24	0.15	98.68		2019-04-18		67.7746	0.760032	15.7681	3.35428	0.0304013	1.09445	3.16173	4.61086	3.04013	0.24321	0.152006	98.68
Pink Pumice	#9	68.12	0.8	15.85	3.34	-0.03	1.1	3.22	4.81	3.13	0.2	0.12	100.67		2019-04-18		67.6666	0.794676	15.7445	3.31777	-0.0298003	1.09268	3.19857	4.77799	3.10917	0.198669	0.119201	100.67
NMNH-107955	#1	72.64	0.79	12.37	1.56	0.07	0.15	1.01	4.52	3.39	0.22	0.07	96.79		2018-10-02		75.0491	0.8162	12.7802	1.61174	0.0723215	0.154975	1.0435	4.6699	3.50243	0.227296	0.0723215	96.79
NMNH-107955	#2	72.96	0.78	12.41	2.72	0.16	0.46	1.21	3.64	3.12	0.25	0.08	97.79		2018-10-02		74.6089	0.797628	12.6905	2.78147	0.163616	0.470396	1.23735	3.72226	3.19051	0.25565	0.081808	97.79
NMNH-107955	#3	72.13	0.95	12.62	2.6	0.14	0.38	1.39	3.75	3.09	0.15	0.05	97.25		2018-10-02		74.1697	0.976864	12.9769	2.67352	0.143959	0.390746	1.42931	3.85604	3.17738	0.154242	0.0514139	97.25
NMNH-107955	#4	71.76	0.76	12.22	2.82	0.06	0.35	1.26	4.39	3.3	0.17	0.05	97.14		2018-10-02		73.8728	0.782376	12.5798	2.90303	0.0617665	0.360305	1.2971	4.51925	3.39716	0.175005	0.0514721	97.14
NMNH-107955	#5	70.99	0.9	12.73	2.69	0.08	0.46	1.42	4.04	3.28	0.22	0.09	96.9		2018-10-02		73.2611	0.928793	13.1373	2.77606	0.0825593	0.474716	1.46543	4.16925	3.38493	0.227038	0.0928793	96.9
NMNH-107955	#6	65.99	0.82	14.45	2.87	0.06	0.98	2.48	3.22	3.5	0.22	0.13	94.72		2018-10-02		69.6685	0.865709	15.2555	3.02998	0.0633446	1.03463	2.61824	3.39949	3.6951	0.232264	0.137247	94.72
NMNH-107955	#7	68.09	0.68	15.81	2.21	0.1	0.32	3.17	4.93	2.46	0.14	0.1	98.01		2018-10-02		69.4725	0.693807	16.131	2.25487	0.10203	0.326497	3.23436	5.0301	2.50995	0.142843	0.10203	98.01
NMNH-107955	#8	66.97	0.85	14.54	2.81	0.09	0.97	2.43	4.17	3.34	0.16	0.11	96.44		2018-10-02		69.4421	0.881377	15.0767	2.91373	0.0933223	1.00581	2.5197	4.32393	3.46329	0.165906	0.114061	96.44
NMNH-107955	#9	66.79	0.84	15	3.18	0.09	1.11	3.18	3.75	2.46	0.27	0.07	96.74		2018-10-02		69.0407	0.868307	15.5055	3.28716	0.0930329	1.14741	3.28716	3.87637	2.5429	0.279099	0.0723589	96.74
NMNH-107955	#10	66.02	0.54	15.29	1.92	0.11	0.23	4.13	4.86	2.29	1.09	0.04	96.52		2018-10-02		68.4003	0.55947	15.8413	1.98923	0.113966	0.238293	4.27891	5.03523	2.37257	1.1293	0.0414422	96.52
NMNH-107955	#11	65.83	0.93	14.73	2.83	0.14	0.96	2.66	4.41	3.47	0.23	0.16	96.35		2018-10-02		68.3238	0.965231	15.288	2.93721	0.145304	0.996367	2.76077	4.57706	3.60145	0.238713	0.166061	96.35
NMNH-107955	#12	64.17	0.77	15.96	2.57	0.1	0.8	3.8	4.67	2.9	0.42	0.1	96.26		2018-10-02		66.6632	0.799917	16.5801	2.66985	0.103885	0.831082	3.94764	4.85144	3.01267	0.436318	0.103885	96.26
NMNH-107956-1	#1	68.22	0.65	13.13	2.24	-0.05	0.49	1.47	3.97	3.1	0.12	0.09	93.43		2018-10-02		73.0172	0.695708	14.0533	2.39752	-0.053516	0.524457	1.57337	4.24917	3.31799	0.128438	0.0963288	93.43
NMNH-107956-1	#2	70.21	0.5	14.75	1.99	-0.09	0.4	2.11	4.03	3	0.17	0.1	97.17		2018-10-02		72.2548	0.514562	15.1796	2.04796	-0.0926212	0.41165	2.17145	4.14737	3.08737	0.174951	0.102912	97.17
NMNH-107956-1	#3	68.7	0.62	14.52	2.58	0.07	0.68	2.17	3.17	2.91	0.19	0.14	95.75		2018-10-02		71.7493	0.64752	15.1645	2.69452	0.073107	0.710183	2.26632	3.3107	3.03916	0.198433	0.146214	95.75
NMNH-107956-1	#4	67.56	0.72	15.45	2.76	0.04	0.87	3.15	4.35	2.42	0.3	0.12	97.74		2018-10-02		69.1222	0.736648	15.8072	2.82382	0.0409249	0.890117	3.22284	4.45058	2.47596	0.306937	0.122775	97.74
NMNH-107956-1	#5	67.21	0.55	15.62	2.94	0.14	0.92	2.93	4.33	2.6	0.17	0.12	97.53		2018-10-02		68.9121	0.563929	16.0156	3.01446	0.143546	0.943299	3.0042	4.43966	2.66585	0.174305	0.123039	97.53
NMNH-107956-1	#6	67.28	0.66	15.44	2.97	-0.15	0.91	2.88	4.87	2.68	0.22	0.1	97.86		2018-10-02		68.7513	0.674433	15.7776	3.03495	-0.15328	0.9299	2.94298	4.9765	2.73861	0.224811	0.102187	97.86
NMNH-107956-1	#7	67.23	0.69	15.46	3.17	-0.04	0.89	2.79	4.76	2.68	0.2	0.08	97.91		2018-10-02		68.6651	0.704729	15.79	3.23767	-0.0408538	0.908998	2.84956	4.86161	2.73721	0.204269	0.0817077	97.91
NMNH-117624-15	#1	71.28	0.58	11.87	1.64	0.02	0.11	1.05	3.92	3.13	0.19	0.09	93.89		2019-07-05		75.9186	0.617744	12.6425	1.74672	0.0213015	0.117158	1.11833	4.1751	3.33369	0.202364	0.0958569	93.89
NMNH-117624-15	#2	71.13	0.65	13.39	1.87	0.04	0.19	1.22	5.08	3.48	0.15	0.05	97.26		2019-07-05		73.1339	0.668312	13.7672	1.92268	0.0411269	0.195353	1.25437	5.22311	3.57804	0.154226	0.0514086	97.26
NMNH-117624-15	#3	69.66	0.7	13.52	3.24	0.03	0.69	2.11	3.99	3.35	0.11	0.08	97.47		2019-07-05		71.4681	0.71817	13.8709	3.3241	0.0307787	0.70791	2.16477	4.09357	3.43695	0.112855	0.0820765	97.47
NMNH-117624-15	#4	66.2	0.45	15.25	2.62	0.06	0.5	1.61	5	3.48	0.11	0.18	95.47		2019-07-05		69.3412	0.471352	15.9736	2.74432	0.062847	0.523725	1.68639	5.23725	3.64512	0.115219	0.188541	95.47
NMNH-117624-15	#5	64.35	0.95	15.1	3.68	0.02	1.33	3.64	4.88	2.49	0.31	0.15	96.9		2019-07-05		66.4087	0.980392	15.5831	3.79773	0.0206398	1.37255	3.75645	5.03612	2.56966	0.319917	0.154799	96.9
NMNH-117624-15	#6	62.81	1.37	14.97	5.27	0.2	1.52	4.03	4.62	2.42	0.3	0.13	97.65		2019-07-05		64.3216	1.40297	15.3303	5.39683	0.204813	1.55658	4.12698	4.73118	2.47824	0.30722	0.133129	97.65
NMNH-117624-15	#7	73.03	0.46	11.03	1.09	-0.03	0.06	0.44	3.14	4.32	0.06	0.09	93.69		2018-10-02		77.9486	0.490981	11.7729	1.16341	-0.0320205	0.064041	0.469634	3.35148	4.61095	0.064041	0.0960615	93.69
NMNH-117624-15	#8	71.99	0.68	11.15	1.68	-0.04	0.12	0.63	3.48	3.36	0.1	0.11	93.26		2018-10-02		77.1928	0.729144	11.9558	1.80142	-0.0428908	0.128673	0.675531	3.7315	3.60283	0.107227	0.11795	93.26
NMNH-117624-15	#9	73.3	0.46	11.71	0.9	0.05	0.08	0.61	3.65	4.42	0.12	0.02	95.32		2018-10-02		76.8989	0.482585	12.2849	0.944188	0.0524549	0.0839278	0.63995	3.82921	4.63701	0.125892	0.020982	95.32
NMNH-117624-15	#10	73.85	0.43	12.53	0.94	-0.1	0.08	0.78	3.95	4.29	0.14	0.02	96.91		2018-10-02		76.2047	0.443711	12.9295	0.969972	-0.103189	0.0825508	0.80487	4.07595	4.42679	0.144464	0.0206377	96.91
NMNH-117624-15	#11	70.67	0.89	12.94	3.15	0.11	0.67	1.82	3.6	3.41	0.2	0.07	97.53		2018-10-02		72.4598	0.91254	13.2677	3.22978	0.112786	0.686968	1.86609	3.69117	3.49636	0.205065	0.0717728	97.53
NMNH-117624-15	#12	70.63	0.9	13.48	2.85	0.08	0.56	1.62	3.78	3.53	0.16	0.09	97.68		2018-10-02		72.3075	0.921376	13.8002	2.91769	0.0819001	0.573301	1.65848	3.86978	3.61384	0.1638	0.0921376	97.68
NMNH-117624-15	#13	70.66	0.76	14.53	2.1	0.05	0.35	2.18	4.17	3.25	0.19	0.07	98.31		2018-10-02		71.8747	0.773065	14.7798	2.1361	0.0508595	0.356017	2.21748	4.24168	3.30587	0.193266	0.0712033	98.31
NMNH-117624-15	#14	67.22	1.26	14.15	4.16	0.14	1.1	2.6	3.93	3.19	0.39	0.09	98.23		2018-10-02		68.4312	1.2827	14.405	4.23496	0.142523	1.11982	2.64685	4.00081	3.24748	0.397027	0.0916217	98.23
NMNH-117624-15	#15	65.59	0.65	15.22	2.93	-0.02	1	3.02	4.76	2.4	0.26	0.1	95.91		2018-10-02		68.387	0.677719	15.869	3.05495	-0.0208529	1.04264	3.14879	4.96299	2.50235	0.271087	0.104264	95.91
NMNH-117624-15	#16	64.19	0.93	14.73	3.91	0.18	1.36	3.26	4.28	2.95	0.28	0.09	96.16		2018-10-02		66.7533	0.967138	15.3182	4.06614	0.187188	1.41431	3.39018	4.45092	3.0678	0.291181	0.093594	96.16
NMNH-117624-15	#17	63.14	1.72	14.26	5.3	0.15	1.52	3.54	3.95	2.63	0.42	0.12	96.75		2018-10-02		65.261	1.77778	14.739	5.47804	0.155039	1.57106	3.65891	4.08269	2.71835	0.434109	0.124031	96.75
NMNH-117624-15	#18	62.04	1.3	15.12	5.68	0.1	2.12	4.04	4.33	2.43	0.34	0.12	97.62		2018-10-02		63.5526	1.33169	15.4886	5.81848	0.102438	2.17169	4.1385	4.43557	2.48924	0.348289	0.122926	97.62
NMNH-117624-15	#19	59.97	1.34	15.47	5.41	0.09	2	4.4	4.87	2.2	0.32	0.16	96.23		2018-10-02		62.3194	1.3925	16.0761	5.62195	0.0935259	2.07835	4.57238	5.06079	2.28619	0.332537	0.166268	96.23
NMNH-117624-16	#1	72.98	0.69	12.83	2.78	0.09	0.39	1.29	3.42	3.37	0.14	0.09	98.07		2018-10-02		74.4162	0.703579	13.0825	2.83471	0.0917712	0.397675	1.31539	3.4873	3.43632	0.142755	0.0917712	98.07
NMNH-117624-16	#2	71.71	0.99	12.15	3.22	0.11	0.42	1.5	3.93	3.49	0.25	0.09	97.86		2018-10-02		73.2782	1.01165	12.4157	3.29041	0.112405	0.429185	1.5328	4.01594	3.56632	0.255467	0.0919681	97.86
NMNH-117624-16	#3	69.58	0.81	12.61	2.7	0.17	0.44	1.53	3.76	3.15	0.18	0.09	95.02		2018-10-02		73.2267	0.852452	13.2709	2.84151	0.17891	0.46306	1.61019	3.95706	3.31509	0.189434	0.0947169	95.02
NMNH-117624-16	#4	70.99	0.92	12.64	2.66	-0.16	0.4	1.52	3.77	4.2	0.18	0.04	97.16		2018-10-02		73.065	0.946892	13.0095	2.73775	-0.164677	0.411692	1.56443	3.8802	4.32277	0.185261	0.0411692	97.16
NMNH-117624-16	#5	68.97	0.98	12.59	3.3	-0.2	0.61	1.55	3.9	3.31	0.23	0.1	95.34		2018-10-02		72.3411	1.0279	13.2054	3.4613	-0.209776	0.639815	1.62576	4.09062	3.47179	0.241242	0.104888	95.34
NMNH-117624-16	#6	67.33	1	15.02	3.55	0.04	1.16	2.98	3.91	3.01	0.32	0.12	98.44		2018-10-02		68.397	1.01585	15.258	3.60626	0.0406339	1.17838	3.02722	3.97196	3.0577	0.325071	0.121902	98.44
NMNH-117624-16	#7	66.32	0.99	15.01	3.49	0.1	1.12	3.05	4.19	3.05	0.31	0.29	97.92		2018-10-02		67.7288	1.01103	15.3288	3.56413	0.102124	1.14379	3.11479	4.279	3.11479	0.316585	0.29616	97.92

## Sheet: Secondary stds majors
		SiO2	TiO2	Al2O3	FeOt	MnO	MgO	CaO	Na2O	K2O	P2O5	Cl	Original total
		wt%	wt%	wt%	wt%	wt%	wt%	wt%	wt%	wt%	wt%	wt%	wt%
RECOMMENDED VALUES (Kuehn et al. 2011)
	Lipari	74.1	0.074	13.1	1.55	0.065	0.041	0.73	4.07	5.11	0.01	0.34	99.19	Mean
		1.4	0.02	0.5	0.05	0.031	0.022	0.06	0.22	0.27	0.02	0.05		2SD
	Laki	49.7	3.08	13	14.1	0.231	5.39	9.7	2.85	0.46	0.345	0.046	98.9	Mean
		1.4	0.22	0.5	0.6	0.101	0.25	0.38	0.25	0.04	0.053	0.042		2SD
		ORIGINAL DATA
2013-07-10	Lipari	73.24	0.09	12.98	1.55	0.12	0.04	0.74	3.77	5.1	-	0.32	97.96
2013-07-10	Lipari	74.29	0.02	13.07	1.57	0.01	0.04	0.77	3.67	5.06	-	0.42	98.92
2013-07-10	Lipari	74.28	0.09	13.03	1.68	0.03	0.02	0.72	4.13	5.08	-	0.39	99.44
2013-07-10	Lipari	73.73	0.08	13.04	1.52	0.01	0.02	0.66	3.94	5.12	-	0.38	98.5
2013-07-10	Lipari	74.35	0.08	13.14	1.47	0.1	0.04	0.74	4.2	5.13	-	0.42	99.66
2013-07-10	Lipari	74.62	0.11	13.19	1.54	-0.02	0.04	0.73	4.03	5.12	-	0.37	99.73
2013-08-07	Lipari	74.24	0.05	13.12	1.56	0.06	0.04	0.75	4.25	5.2	-	0.32	99.58
2013-08-07	Lipari	74.4	0.1	13.37	1.55	0.13	0.06	0.68	4.23	5.14	-	0.4	100.05
2013-08-07	Lipari	74.64	0.07	13.38	1.69	0.22	0.04	0.76	3.99	5.05	-	0.36	100.2
2013-08-07	Lipari	74.72	0.07	12.89	1.55	0.03	0.05	0.69	3.84	5.2	-	0.37	99.39
2013-08-07	Lipari	75.2	0.04	13.29	1.58	0.11	0.02	0.68	3.93	5.26	-	0.33	100.43
2013-08-07	Lipari	75.24	0.06	13.05	1.73	0.02	0.05	0.76	3.87	5.17	-	0.32	100.28
2013-08-07	Lipari	74.75	0.05	13.23	1.68	-0.03	0.03	0.71	3.94	5.22	-	0.35	99.92
2013-08-07	Lipari	75.25	0.11	13.07	1.61	0	0.05	0.73	3.74	5.15	-	0.36	100.06
2013-08-07	Lipari	74.89	0.05	13.19	1.58	0.13	0.02	0.66	3.92	5.13	-	0.34	99.93
2018-10-02	Lipari	71.93	0.09	12.9	1.54	-0.01	0.03	0.76	4.05	4.84	-0.04	0.38	96.47
2018-10-02	Lipari	72.21	0.08	13.07	1.52	0.07	0.06	0.69	4.04	4.85	0.15	0.35	97.1
2018-10-02	Lipari	72.25	0.04	12.91	1.5	0.26	0.03	0.76	3.67	4.93	0.17	0.4	96.91
2018-10-02	Lipari	71.67	0.02	12.83	1.52	0.12	0.04	0.69	4.07	4.7	0.1	0.32	96.07
2018-10-02	Lipari	72.76	0.1	13.07	1.57	0.12	0.04	0.77	3.99	5.01	0.03	0.36	97.82
2018-10-02	Lipari	72.39	0.06	12.87	1.39	0.02	0.01	0.8	3.92	4.97	0.1	0.34	96.87
2018-10-02	Laki	47.41	3.02	12.65	13.72	0.22	5.37	9.58	2.88	0.45	0.32	0.08	95.7
2018-10-02	Laki	47.32	2.74	12.6	13.82	0.31	5.62	9.72	2.37	0.39	0.37	0	95.26
2018-10-02	Laki	47.7	3.1	12.71	13.39	0.16	5.43	9.56	2.95	0.41	0.3	0.04	95.74
2018-11-30	Lipari	72.75	0.07	12.87	1.65	0.07	0.07	0.76	4.13	5.05	0.01	0.38	97.81
2018-11-30	Lipari	72.63	0.12	13.04	1.58	0.06	0.02	0.83	4	4.97	0.03	0.33	97.6
2018-11-30	Lipari	72.68	0.06	13.13	1.5	-0.04	0.05	0.76	4.01	4.99	0	0.34	97.48
2018-11-30	Lipari	72.44	0.07	13.01	1.51	0.08	0.05	0.77	4.1	4.95	0.04	0.37	97.39
2018-11-30	Lipari	73.67	0.08	13.11	1.5	0.03	0.03	0.8	4	5.05	0	0.36	98.61
2018-11-30	Lipari	73.11	0.07	13.17	1.53	0.05	0.07	0.72	3.86	5.11	0.07	0.36	98.12
2018-11-30	Laki	49.18	2.88	13.04	13.91	0.27	4.85	9.89	2.76	0.4	0.4	0.03	97.62
2018-11-30	Laki	49.02	2.85	13.02	13.94	0.15	4.86	9.77	2.8	0.45	0.44	0.05	97.36
2018-11-30	Laki	49.06	2.63	13	13.71	0.13	4.84	9.76	2.48	0.42	0.32	0.01	96.36
2019-04-18	Lipari	73.57	0.03	13.2	1.6	0.1	0.06	0.72	3.84	4.99	-0.04	0.36	98.42
2019-04-18	Lipari	73.08	0.07	13.25	1.51	0.03	0.04	0.71	3.98	5.06	-0.03	0.34	98.02
2019-04-18	Lipari	73.33	0.02	13.4	1.6	0.03	0.06	0.72	3.79	5.06	-0.02	0.35	98.37
2019-04-18	Lipari	74.39	0.07	13.56	1.59	0.05	0.04	0.71	3.95	4.95	0.01	0.35	99.67
2019-04-18	Lipari	73.5	0.05	13.41	1.62	0.05	0.07	0.76	4.05	5.13	-0.01	0.41	99.04
2019-04-18	Laki	49.08	2.98	13.15	13.97	0.2	5.48	9.9	3.07	0.48	0.4	0.07	98.79
2019-04-18	Laki	48.89	2.99	13.16	14.06	0.24	5.5	9.81	3.05	0.49	0.26	0.02	98.46
2019-04-18	Laki	49.03	3.04	13.28	13.88	0.18	5.34	9.81	2.96	0.45	0.32	0.06	98.35
2019-07-05	Lipari	73.68	0.08	12.99	1.52	0.05	0.03	0.73	4.23	4.91	-0.04	0.37	98.55
2019-07-05	Lipari	73.77	0.03	13.14	1.61	0.09	0.05	0.74	3.8	4.94	0.06	0.41	98.66
2019-07-05	Lipari	73.72	0.05	13.08	1.56	0.03	0.03	0.75	4.19	4.94	-0.05	0.38	98.68
2019-07-05	Lipari	74.17	0.04	13.06	1.54	0.08	0.04	0.7	4.15	5.08	0.01	0.35	99.22
2019-07-05	Laki	49	2.57	12.79	13.7	0.21	5.05	9.46	3.23	0.38	0.32	0.02	96.73
2019-07-05	Laki	48.69	2.54	12.76	13.74	0.36	5	9.53	3.07	0.44	0.34	0.08	96.56
2019-07-05	Laki	48.78	2.48	12.66	13.6	0.29	5.18	9.61	2.99	0.39	0.34	0.01	96.35
2018-03-27	Lipari	72.08	0.03	12.97	1.56	-0.09	0.05	0.75	3.96	5	-0.01	0.34	96.65
2018-03-27	Lipari	72.12	0.06	13.06	1.61	0.02	-0.02	0.77	4.01	4.93	0.04	0.35	96.96
2018-03-27	Lipari	72.04	0.1	13.14	1.58	-0.11	0.04	0.71	3.95	5.05	-0.05	0.31	96.76
2018-03-27	Lipari	72.21	0.06	12.77	1.62	0.11	0.04	0.73	3.93	4.98	0.02	0.34	96.83
2018-03-27	Lipari	72.33	0.07	12.9	1.55	0.15	0.03	0.77	4.12	4.91	0.03	0.37	97.23
2018-03-27	Lipari	71.99	0.04	12.98	1.33	0.09	0.04	0.75	4.08	5	0.03	0.36	96.69
2018-03-27	Lipari	72.01	0.03	12.86	1.48	0.1	0.02	0.78	4.11	5.01	0.1	0.33	96.83
2018-03-27	Laki	47.54	2.69	12.63	13.98	0.09	5.03	9.66	3.24	0.43	0.31	0.04	95.64
2018-03-27	Laki	47.76	2.71	12.78	13.83	0.28	4.84	9.54	3	0.44	0.29	0.05	95.51
2018-03-27	Laki	48.08	2.63	12.7	13.98	0.12	4.93	9.49	2.74	0.48	0.36	0.04	95.56
2018-03-27	Laki	47.45	2.71	12.79	13.39	0.25	5.04	9.48	3.03	0.41	0.43	0.07	95.06
2018-03-27	Laki	48.24	2.66	13.01	14.06	0.38	4.91	9.63	3.01	0.4	0.3	0.06	96.66

## Sheet: LA-ICP-MS traces
Sample	Point	Rb	Sr	Y	Zr	Nb	Ba	La	Ce	Pr	Nd	Gd	Yb172	Hf178	Ta181	Pb207	Th232	U238	Date of analysis
QUB-1832	Shard #1	38.3103	366.326	29.771	143.148	9.40916	516.234	15.6664	37.9395	4.38754	18.8065	5.74907	3.18694	3.7642	<LOD	<LOD	3.33072	<LOD	2015-10-01
QUB-1832	Shard #2a	39.6923	363.943	30.9046	167.774	12.1664	592.532	16.4138	38.5078	7.21831	25.5144	<LOD	<LOD	<LOD	<LOD	<LOD	<LOD	<LOD	2015-10-01
QUB-1832	Shard #2b	48.248	346.199	28.2065	151.852	<LOD	513.344	14.5628	36.1959	4.84176	22.1896	<LOD	<LOD	<LOD	<LOD	<LOD	<LOD	<LOD	2015-10-01
QUB-1832	Shard #3	29.8767	372.612	29.004	167.473	12.8258	636.505	19.4211	38.6622	6.69134	27.1787	<LOD	<LOD	3.7496	<LOD	<LOD	<LOD	<LOD	2015-10-01
QUB-1832	Shard #6a	36.8148	346.565	29.76	153.597	10.8655	528.37	15.2297	38.8712	6.64861	22.7116	<LOD	<LOD	<LOD	<LOD	<LOD	<LOD	<LOD	2015-10-01
QUB-1832	Shard #6b	46.1286	357.149	27.6289	139.962	9.24956	597.999	15.1805	36.8538	4.77585	19.5762	6.06256	3.46136	3.74609	<LOD	<LOD	3.31174	<LOD	2015-10-01
QUB-1832	Shard #7b	62.551	294.039	37.6575	236.09	13.7644	838.939	22.3039	56.0659	6.92819	30.8133	<LOD	<LOD	7.04855	<LOD	32.6389	5.02889	<LOD	2015-10-01
QUB-1832	Shard #7a	66.371	300.835	39.3971	217.17	16.1855	889.297	25.1235	55.3683	7.56531	30.9475	<LOD	<LOD	5.50965	<LOD	<LOD	5.597	<LOD	2015-10-01
QUB-1833	Shard #1	34.2781	378.472	25.662	121.625	7.77676	455.519	14.4205	34.2583	4.34839	19.6995	<LOD	<LOD	2.93031	<LOD	<LOD	2.69722	<LOD	2015-10-01
QUB-1833	Shard #2a	44.3668	343.707	28.5694	149.675	9.78971	594.256	16.0301	36.7576	4.93167	19.9931	6.19613	2.95215	3.8757	<LOD	<LOD	3.8295	<LOD	2015-10-01
QUB-1833	Shard #2b	51.4479	353.495	30.1077	158.153	10.2369	635.707	17.5302	40.6525	5.17358	21.345	<LOD	<LOD	4.15924	<LOD	<LOD	3.8007	<LOD	2015-10-01
QUB-1833	Shard #3	66.35	288.652	19.5186	258.818	<LOD	884.26	22.0925	49.9819	<LOD	<LOD	<LOD	<LOD	9.04927	<LOD	<LOD	<LOD	<LOD	2015-10-01
QUB-1859	Shard #5	54.3214	403.854	22.8007	207.69	17.4979	934.284	32.214	69.9431	8.42472	30.7723	5.91137	2.49802	5.23442	<LOD	13.6927	4.60884	<LOD	2015-10-01
QUB-1859	Shard #7	36.4109	360.437	28.0839	138.743	8.64693	514.196	15.4264	39.5971	4.5266	19.3069	5.47412	3.14426	4.19698	<LOD	<LOD	3.45919	<LOD	2015-10-01
NMNH-107955	#1-1	119.15	141.69	24.88	332.89	11.27	851.76	28.06	63.4	7.57	29.06	5.11	2.89	8.13	0.84	17.71	10.39	3.94	2019-09-16
NMNH-107955	#1-10	96.2	157.74	24.38	275.36	9.62	801.94	25.94	58.38	6.66	28.67	5.3	2.17	6.54	0.69	17.8	7.91	3.26	2019-09-16
NMNH-107956-1	#2-2	52.34	206.9	12.56	181.78	4.22	426.02	14.06	27.46	3.91	14.93	2.37	1.18	3.91	0.36	11.34	3.98	1.69	2019-09-16
NMNH-117624-15	#3-10	125.13	285.15	21.09	288.86	8.91	783.43	24.51	52.54	6.24	22.87	4.34	2.37	7.28	0.72	14.52	11.03	4.17	2019-09-16
NMNH-117624-15	#3-11	82.9	369.01	21.79	244.6	9.17	623.09	21.37	48.74	5.78	25.3	4.64	2.24	6.82	0.64	12.69	8.08	3.19	2019-09-16
NMNH-117624-15	#3-14	166.29	92.38	25.99	375.95	9.8	763.16	27.75	63.94	7.19	30.69	4.98	2.57	10.32	1.06	16.99	13.98	5.94	2019-09-16
NMNH-117624-15	#3-18	88.79	304.47	27.18	254.5	8.05	697	23.9	52.09	6.54	29.98	5.82	2.81	6.47	0.63	13.08	8.23	3.2	2019-09-16
NMNH-117624-15	#3-19	79.3	219.26	24.78	287.6	10.34	670.58	24.23	55.51	6.58	28.32	5.48	2.21	7.2	0.81	14.58	9.32	3.74	2019-09-16
NMNH-117624-16	#4-5	85.63	466.77	14.58	164.99	6.16	587.55	16.85	35.26	4.37	18.34	3.17	1.45	3.76	0.46	10.41	4.8	2.16	2019-09-16
NMNH-117624-16	#4-12	79.4	248.82	26.02	223.21	7.61	611.44	23.93	54.52	7.35	30.01	5.27	3.06	5.71	0.57	12	8.09	2.62	2019-09-16

## Sheet: Secondary stds LA-ICP-MS
	Rb	Sr	Y	Zr	Nb	Ba	La	Ce	Pr	Nd	Gd	Yb	Hf	Ta	Pb	Th	U
GeoREM	30.7	482	11.4	118	6.94	298	12	26.1	3.2	13	2.59	1.13	3.07	0.42	10.3	2.28	1.01
StHs	32.5447	502.994	10.8205	111.177	7.0266	320.379	11.8166	28.3146	3.25737	13.6037	<LOD	<LOD	3.07594	<LOD	<LOD	<LOD	<LOD	2015-10-01
StHs_1	28.8641	533.656	10.9799	117.349	6.4647	294.861	11.9241	28.0368	3.25476	13.1307	<LOD	<LOD	<LOD	<LOD	<LOD	2.29842	<LOD	2015-10-01
StHs_2	31.3134	461.996	10.6743	101.45	<LOD	303.686	11.2925	27.3668	<LOD	14.7084	<LOD	<LOD	<LOD	<LOD	<LOD	<LOD	<LOD	2015-10-01
StHs_3	34.0415	446.332	10.4267	109.286	<LOD	296.43	11.9094	27.4242	<LOD	11.4319	<LOD	<LOD	3.2643	<LOD	<LOD	<LOD	<LOD	2015-10-01
average	31.6909	486.245	10.7254	109.815	6.74565	303.839	11.7357	27.7856	3.25606	13.2187			3.17012			2.29842
%RSD	6.91031	8.1483	2.19077	5.96854	5.89011	3.84334	2.54976	1.67388	0.0565664	10.3063			4.20161
%bias	3.22777	0.880659	-5.91792	-6.93603	-2.80041	1.95937	-2.2028	6.45826	1.75203	1.68207			3.26122			0.807687
StHs-0	32.1031	491.744	10.8545	113.512	6.97322	318.729	11.3479	26.939	3.04914	12.0716	2.26959	1.01309	2.76298	0.450628	10.5914	2.19722	1.09532	2019-09-16
StHs-1	29.9651	509.177	11.4795	115.124	7.10479	339.451	11.8413	26.8403	3.15111	13.5517	2.69719	1.06243	2.68403	0.404579	11.7426	2.27288	1.0098	2019-09-16
StHs-2	30.8861	503.914	11.1177	120.058	6.34827	336.162	12.2031	27.86	3.30899	13.2557	2.6018	1.05256	2.74653	0.368397	11.5124	2.34853	1.01638	2019-09-16
StHs-3	31.2479	469.706	11.019	121.374	7.33504	323.663	12.565	25.2615	2.83863	13.0255	2.6643	1.2236	2.95704	0.437471	11.3479	2.21038	1.1315	2019-09-16
average	31.0506	493.635	11.1177	117.517	6.94033	329.501	11.9893	26.7252	3.08697	12.9761	2.55822	1.08792	2.78765	0.415269	11.2986	2.25725	1.06325
%RSD	2.85166	3.55407	2.37916	3.22512	6.08164	3.00182	4.33494	4.03535	6.384	4.93483	7.67903	8.5422	4.23082	8.85276	4.41187	3.06675	5.62757
%bias	1.14197	2.41395	-2.47642	-0.409384	0.00478528	10.5709	-0.0888211	2.39545	-3.53226	-0.183704	-1.22704	-3.72374	-9.19722	-1.1265	9.69512	-0.997695	5.2725
GeoREM	65.3	94.1	94.5	512	62.4	547	55.6	121	14.6	60.9	15.3	10.5	13.7	3.9	5.67	7.4	2.37
ATho	66.5474	99.2619	88.0779	483.999	62.7698	584.296	57.8854	126.382	15.9248	59.8674	16.439	9.85433	13.4471	3.58395	<LOD	7.21112	<LOD	2015-10-01
ATho_1	64.9187	95.6631	88.3926	490.355	59.9446	510.035	54.9163	134.31	14.9282	62.2325	15.5639	10.5462	13.5759	3.41821	<LOD	7.10951	<LOD	2015-10-01
ATho_2	74.353	86.8629	90.5689	467.712	68.8179	531.647	47.8315	124.938	16.2602	59.9213	15.4052	10.4167	14.8925	<LOD	<LOD	7.22836	<LOD	2015-10-01
ATho_3	66.0284	85.2746	89.2998	471.667	63.0405	554.156	50.1432	126.459	14.0124	61.3624	16.6059	11.3467	13.8278	<LOD	<LOD	8.00566	<LOD	2015-10-01
average	67.9619	91.7656	89.0848	478.433	63.6432	545.033	52.6941	128.022	15.2814	60.8459	16.0035	10.541	13.9358	3.50108		7.38866
%RSD	6.34854	7.379	1.25367	2.20487	5.8499	5.82989	8.63006	3.31955	6.6598	1.89817	3.79018	5.83832	4.71517	3.34733		5.61216
%bias	4.07634	-2.48075	-5.73036	-6.55602	1.9923	-0.359529	-5.22643	5.80357	4.66698	-0.088866	4.59789	0.390223	1.72146	-10.2288		-0.153209
ATho-0	59.8028	93.2955	87.0497	469.991	61.2861	555.479	54.8843	122.963	14.4042	60.5054	14.2481	9.68087	12.2572	3.75524	5.73826	7.33872	2.23675	2019-09-16
ATho-1	63.2379	97.199	89.7822	476.236	62.7305	574.216	55.4698	128.818	15.4582	65.1897	14.4042	9.75894	12.3353	3.73182	6.08958	7.41679	2.27578	2019-09-16
ATho-3	66.7511	100.712	91.734	514.882	62.6524	612.471	58.5146	131.55	15.7704	64.1357	14.9897	10.5397	12.6866	4.24319	5.8944	8.00233	2.53342	2019-09-16
ATho-2	70.0301	94.4665	90.563	526.983	58.4756	580.462	59.6076	126.476	15.302	66.634	15.1068	10.8519	12.7647	3.94651	5.77729	7.88522	2.35776	2019-09-16
average	64.9555	96.4183	89.7822	497.023	61.2861	580.657	57.1191	127.452	15.2337	64.1162	14.6872	10.2079	12.511	3.91919	5.87488	7.66077	2.35093
%RSD	6.79698	3.4194	2.21697	5.66622	3.2432	4.08464	4.02473	2.85678	3.84867	4.08006	2.89017	5.66775	2.01403	6.03282	2.68535	4.33121	5.60199
%bias	-0.527567	2.46368	-4.99234	-2.92524	-1.78504	6.15299	2.73214	5.33202	4.34044	5.28117	-4.00521	-2.78238	-8.67912	0.49205	3.61343	3.52388	-0.804708
GeoREM	5.8	312	23.9	122	8.61	80.1	8.99	23.1	3.43	16.7	5.26	2.06	3.22	0.555		0.548	0.442
ML3B	<LOD	324.994	22.0739	113.44	8.24326	78.7325	8.67755	24.2699	3.58762	17.5976	5.34895	<LOD	3.13682	<LOD	<LOD	<LOD	<LOD	2015-10-01
ML3B_1	<LOD	277.152	21.5719	115.897	8.57967	87.102	8.62365	22.6029	3.34417	15.3911	5.34701	<LOD	<LOD	<LOD	<LOD	<LOD	<LOD	2015-10-01
