# Supplementary material for: No evidence for tephra in Greenland from the historic eruption of Vesuvius in 79 CE: Implications for geochronology and paleoclimatology
Source: Copernicus journal article supplement (doi:10.5194/cp-2021-63), 2021-06-16
Supplement: Supplementary file 2 [file Dataset 2.xlsx]

## Sheet: READ_ME
Supplementary Data for
No evidence for tephra in Greenland from the historic eruption of Vesuvius in 79 CE: Implications for geochronology and paleoclimatology
Gill Plunkett, Michael Sigl, Hans Schwaiger, Emma Tomlinson, Matthew Toohey, Joseph R. McConnell, Jonathan R. Pilcher, Takeshi Hasegawa and Claus Siebe
Submitted to Climate of the Past
1) Details of volcanic eruptions (VEI 4 or higher, or Icelandic) in the period ~100 BCE to 300 CE, based on the Smithsonian Global Volcanic Program (GVP) database.
Age of eruption follows GVP, unless otherwise stated. Potential match with QUB-1832/3 is evaluated on the basis of available data. The GVP database was also used to determine if a
volcano had a known eruption in the 6th century CE that might correlate with QUB-1859.
2) Representative major element glass geochemistry of VEI 4 to 6 eruptions
References
Albert, P.G., Smith, V.C., Suzuki, T., McLean, D., Tomlinson, E.L., Miyabuchi, Y., Kitaba, I., Mark, D.F., Moriwaki, H., Members, S.P. and Nakagawa, T. 2019 Geochemical characterisation of the Late Quaternary widespread Japanese tephrostratigraphic markers and correlations to the Lake Suigetsu sedimentary archive (SG06 core). Quaternary Geochronology 52, 103–131.
Carazzo, G., Tait, S., Michaud-Dubuy, A., Fries, A. and Kaminski, E. 2020. Transition from stable column to partial collapse during the 79 cal CE P3 Plinian eruption of Mt. Pelée volcano (Lesser Antilles). Journal of Volcanology and Geothermal Research 392, p.106764.
Andreastuti, S.D. 1999 Stratigraphy and geochemistry of Merapi Volcano, Central Java, Indonesia: implication for assessment of volcanic hazards. PhD, University of Auckland.
Barber, K., Langdon, P. and Blundell, A. 2008 Dating the Glen Garry tephra: a widespread late-Holocene marker horizon in the peatlands of northern Britain. The Holocene 18, 31–43.
DeVitre, C.L., Gazel, E., Allison, C.M., Soto, G., Madrigal, P., Alvarado, G.E. and Lücke, O.H. 2019 Multi-stage chaotic magma mixing at Turrialba volcano. Journal of Volcanology and Geothermal Research 381, 330–346.
Di Piazza, A., Rizzo, A.L., Barberi, F., Carapezza, M.L., De Astis, G., Romano, C. and Sortino, F. 2015 Geochemistry of the mantle source and magma feeding system beneath Turrialba volcano, Costa Rica. Lithos 232, 319–335.
Dugmore, A.J., Newton, A.J., Larsen, G. and Cook, G.T. (2000) Tephrochronology, environmental change and the Norse settlement of Iceland. Environmental Archaeology 5, 21–34.
Foit, F.F., Gavin, D.G. and Hu, F.S. 2004 The tephra stratigraphy of two lakes in south-central British Columbia, Canada and its implications for mid-late Holocene volcanic activity at Glacier Peak and Mount St. Helens, Washington, USA. Canadian Journal of Earth Sciences 41, 1401–1410.
Garrison, J.M., Davidson, J.P., Hall, M. and Mothes, P. 2011 Geochemistry and petrology of the most recent deposits from Cotopaxi Volcano, Northern Volcanic Zone, Ecuador. Journal of Petrology 52, 1641–1678.
Hogg, A., Lowe, D.J., Palmer, J., Boswijk, G. and Ramsey, C.B. 2012 Revised calendar date for the Taupo eruption derived by 14C wiggle-matching using a New Zealand kauri 14C calibration data set. The Holocene 22, 439–449.
Kutterolf, S., Freundt, A. and Burkert, C. 2011 Eruptive history and magmatic evolution of the 1.9 kyr Plinian dacitic Chiltepe Tephra from Apoyeque volcano in west-central Nicaragua. Bulletin of Volcanology 73, 811–831.
Kutterolf, S., Freundt, A., Perez, W., Mörz, T., Schacht, U., Wehrmann, H. and Schmincke, H.U. 2008 Pacific offshore record of plinian arc volcanism in Central America: 1. Along‐arc correlations. Geochemistry, Geophysics, Geosystems 9, Q02S01, doi.org/10.1029/2007GC001631.
Kyle, P.R., Ponomareva, V.V. and Rourke Schluep, R. 2011 Geochemical characterization of marker tephra layers from major Holocene eruptions in Kamchatka, Russia. International Geological Review 53, 1059–1097.
Larsen, G., Newton, A.J., Dugmore, A.J. and Vilmundardóttir, E.G. 2001 Geochemistry, dispersal, volumes and chronology of Holocene silicic tephra layers from the Katla volcanic system, Iceland. Journal of Quaternary Science 16, 119–132.
Legros, F. 2001 Tephra stratigraphy of Misti volcano, Peru. Journal of South American Earth Sciences 14, 15–29.
Macias, J.L., Espíndola, J.M., Garcia-Palomo, A., Scott, K.M., Hughes, S. and Mora, J.C. 2000 Late Holocene Peléan-style eruption at Tacaná volcano, Mexico and Guatemala: Past, present, and future hazards. Geological Society of America Bulletin 112, 1234–1249.
Martel, C. and Poussineau, S. 2007 Diversity of eruptive styles inferred from the microlites of Mt Pelée andesite (Martinique, Lesser Antilles). Journal of Volcanology and Geothermal Research 166, 233–254.
McConnell, J.R., Sigl, M., Plunkett, G., Burke, A., Wilson, A.J., Manning, J., Ludlow, F., Chellman, N.J., Innes, H.M., Larsen, J.F., Schaefer, J.R., Kipfstuhl, S., Mojtabavi, S., Whilhelms, F., Opel, T., Meyer, H. and Steffensen, J.P. 2020 Extreme climate after massive eruption of Alaska’s Okmok volcano in 43 BCE and effects on the late Roman Republic and Ptolemaic Kingdom. Proceedings of the Na…
Newnham, R.M., Lowe, D.J. and Wigley, G.N.A., 1995. Late Holocene palynology and palaeovegetation of tephra‐bearing mires at Papamoa and Waihi Beach, western Bay of Plenty, North Island, New Zealand. Journal of the Royal Society of New Zealand 25, 283–300.
Óladóttir, B.A., Sigmarsson, O., Larsen, G. & Thordardson, T. 2008 Katla volcano, Iceland: magma composition, dynamic and eruption frequency as recorded by Holocene tephra layers. Bulletin of Volcanology 70, 475–493.
Plunkett, G., Coulter, S.E., Ponomareva, V.V., Blaauw, M., Klimaschewski, A. and Hammarlund, D. 2015 Distal tephrochronology in volcanic regions: Challenges and insights from Kamchatkan lake sediments. Global and Planetary Change 134, 26-40.
Ponomareva, V., Portnyagin, M., Pendea, I.F., Zelenin, E., Bourgeois, J., Pinegina, T. & Kozhurin, A. 2017 A full Holocene tephrochronology for the Kamchatsky Peninsula region: Applications from Kamchatka to North America. Quaternary Science Reviews 168, 101–122.
Ponomareva, V.V., Portnyagin, M., Pevzner, M., Blaauw, M., Kyle, P. and Derkachev, A. 2015 Tephra from andesitic Shiveluch volcano, Kamchatka, NW Pacific: chronology of explosive eruptions and geochemical fingerprinting of volcanic glass. International Journal of Earth Science 104, 1459–1482, doi:10.1007/s00531-015-1156-4
Preece, S.J., McGimsey, R.G., Westgate, J.A., Pearce, N.J.G., Hart, W.K. and Perkins, W.T. 2014 Chemical complexity and source of the White River Ash, Alaska and Yukon. Geosphere 10, 1020–1042.
Reuther, J., Potter, B., Coffman, S., Smith, H. and Bigelow, N. 2020 Revisiting the Timing of the Northern Lobe of the White River Ash Volcanic Event in Eastern Alaska and Western Yukon. Radiocarbon 62, 169–188.
Robin, C., Eissen, J.P. and Monzier, M. 1993 Giant tuff cone and 12-km-wide associated caldera at Ambrym Volcano (Vanuatu, New Hebrides Arc). Journal of Volcanology and Geothermal Research 55, 225–238.
Samaniego, P., Robin, C., Chazot, G., Bourdon, E. and Cotten, J. 2010 Evolving metasomatic agent in the Northern Andean subduction zone, deduced from magma composition of the long-lived Pichincha volcanic complex (Ecuador). Contributions to Mineralogy and Petrology 160, 239–260.
Santacroce, R., Cioni, R., Marianelli, P., Sbrana, A., Sulpizio, R., Zanchetta, G., Donahue, D.J. and Joron, J.L. 2008 Age and whole rock–glass compositions of proximal pyroclastics from the major explosive eruptions of Somma-Vesuvius: A review as a tool for distal tephrostratigraphy. Journal of Volcanology and Geothermal Research 177, 1–18.
Shane, P. and Wright, I.C. 2011 Late Quaternary tephra layers around Raoul and Macauley Islands, Kermadec Arc: implications for volcanic sources, explosive volcanism and tephrochronology. Journal of Quaternary Science 26, 422–432.
Wastegård, S., Johansson, H. and Pacheco, J.M. 2020 New major element analyses of proximal tephras from the Azores and suggested correlations with cryptotephras in North‐West Europe. Journal of Quaternary Science 35, 114-121

## Sheet: VEI 4-6 100 BCE to 300 CE
Volcano	Volcanic region	Tectonic setting	Year	Dating method	Glass geochemistry (major)	Eruption 6th century CE	Evaluation
VEI 6
Churchill	Alaska	Intraplate	325±65 CE	Bayesian 14C (Reuther et al., 2020)	Rhyolitic	N	WRAn (Preece et al., 2014); no geochemical correlation; new dating puts it out of chronological range
Ksudach	Kamchatka	Active arc	245-360 CE	Bayesian 14C (Ponomareva et al., 2017)	Rhyolitic	N	KS1 (Kyle et al., 2011; Plunkett et al., 2015); no geochemical correlation; new dating puts it out of chronological range
Taupo	New Zealand	Active arc	232±5 CE	14C WM (Hogg et al., 2012)	Rhyolitic	N	Unit Y (Newnham et al., 1995); No geochemical correlation; new dating puts it out of chronological range
Ambrym	SW Pacific	Active arc	50±100 CE	14C (uncorrected)	Basaltic to basaltic andesitic, dacitic	N	SiO2 content (Robin et al., 1993) inconsistent with QUB-1832/3; geochemical correlation unlikely
Okmok	Alaska	Active arc	43 BCE	Ice core (McConnell et al., 2020)	Andesitic to rhyolitic	N	Okmok CFE (McConnell et al., 2020); No geochemical correlation; New dating puts it out of chronological range
Apoyeque	CAVA	Active arc	50±100 BCE	Tephrochronology	Rhyolitic	N	Chiltepe Tephra (Kutterolf et al., 2011); no geochemical correlation
VEI 5
Masaya	CAVA	Active arc	~150 CE	Tephrochronology	Basaltic andesitic	N	Masaya Tuff (Kutterolf et al., 2008); no geochemical correlation
Furnas	Azores	Intra-plate	80±100 CE	14C (uncorrected)	Trachytic	N	Furnas C (Wastegård et al., 2020); no geochemical correlation
Vesuvius	Italy	Post-subduction	79 CE	Historical Observations	Phonolitic	536 CE	Pompeii pumice (Santacroce et al., 2008); No geochemical correlation
VEI 4
Shiveluch	Kamchatka	Active arc	~250 CE	Tephrochronology	Rhyolitic	~550 CE (Unit 12), ~590 CE (Unit 11)	Unit 18? (Ponomareva et al., 2015); no geochemical correlation; revised dating (~320 CE) out of chronological range
Shiveluch	Kamchatka	Active arc	~100 CE	Tephrochronology	Rhyolitic	~550 CE (Unit 12), ~590 CE (Unit 11)	Unit 21 (SH5) (Ponomareva et al., 2015); no geochemical correlation
Tolbachik	Kamchatka	Active arc	~50 CE	Tephrochronology	No data	~550 CE (VEI 3)	Tolbachik glass typically basaltic to basaltic andesitic (V. Ponomareva, pers. comm. 2017); geochemical correlation unlikely
Glacier Peak	Cascades	Active arc	200±50 CE	14C (uncorrected)	Rhyolitic	N	Glacier Peak A (Foit et al., 2004); no geochemical correlation
Tacaná	TMVB	Active arc	70±100 CE	14C (corrected)	No data	N	San Antonio: Mixcun flow deposit; bulk glass analysis suggests geochemical correlation unlikely
Turrialba	CAVA	Active arc	40±50 CE	14C (corrected)	No data	N	TU37/1 (DiPiazza et al., 2015); whole rock ICP-MS from TU37/1 and glass ICPMS trace data from more recent eruptions (DeVitre et al., 2019) suggest geochemical correlation unlikely
Pelée	Lesser Antilles	Active arc	~300 CE	14C (uncorrected)	No data	N	Wholerock trace data suggest geochemical correlation unlikely
Pelée	Lesser Antilles	Active arc	<50 CE	14C (uncorrected)	No data	N	Wholerock trace data suggest geochemical correlation unlikely
Pelée	Lesser Antilles	Active arc	79±21 CE	14C (Carazzo et al., 2020)	Rhyolitic	N	P3 (Martel and Poussineau, 2007); no geochemical correlation
Liamuiga	Lesser Antilles	Active arc	160±200 CE	14C (uncorrected)	No data	N	Tephra unit F; wholerock trace data suggest geochemical correlation unlikely
Guagua Pichincha	Andean NVZ	Active arc	70±75 CE	14C (corrected)	No data	550±75 CE (no VEI)	Whole-rock traces (Samiengo et al., 2010) suggest geochemical correlation unlikely
Cotopaxi	Andean NVZ	Active arc	180±100 CE	14C (uncorrected)	No data	550±200 CE	KB2; whole-rock traces (Garrison et al., 2011) suggest geochemical correlation unlikely
Cotopaxi	Andean NVZ	Active arc	~150 CE	Tephrochronology	No data	550±200 CE	KA2; whole-rock traces (Garrison et al., 2011) suggest geochemical correlation unlikely
Cotopaxi	Andean NVZ	Active arc	70±150 CE	14C (uncorrected)	Andesitic	550±200 CE	KA1 (Garrison et al., 2011); no geochemical correlation
Calbuco	Andean SVZ	Active arc	160±135 CE	Tephrochronology	No data	500±200 CE	Ca12 tephra; southerly latitude (41° S) makes correlation unlikely
Raoul Island	Kermadec Islands	Active arc	~100 CE	Tephrochronology	No data	~550 CE	No glass data but Shane & Wright (2011) state that K2O is <1 wt% for Raoul glass <3.7 ka; geochemical correlation unlikely
Merapi	Indonesia	Active arc	20±300 CE	14C (corrected)	Rhyolitic	Several, VEI <4	Tegalsruni tephra; Andreastuti 1999; no geochemical correlation
VEI 4: Japan. Trace element geochemical analyses of Japanese tephras (Albert et al., 2019) suggest geochemical match unlikely
Mashu	Southern Kurile Arc	Active arc	150±100 CE	14C (corrected)	No data	N	Ma-c4-c2
Akan	Hokkaido	Active arc	~50 BCE	14C (corrected)	No data	600±300 CE	AS-7 tephra
Zaozan	North East Japan Arc	Active arc	300±200 CE	14C (corrected)	No data	N	Z-To9 tephra
Miyakejima	Izu-Bonin	Active arc	260±500 CE	Tephrochronology	No data	500±50 CE	TGS and TGA tephras
Ata	Southern Volcanic Region	Active arc	~150 CE	Tephrochronology	No data	~550/~600 CE	Tephra set Km-eta
Ata	Southern Volcanic Region	Active arc	~130 CE	Tephrochronology	No data	~550/~600 CE	Tephra set Km-theta
Ata	Southern Volcanic Region	Active arc	~80 BCE	Tephrochronology	No data	~550/~600 CE	Tephra set Km-kappa
Kujusan	Central Volcanic Region	Active arc	100±300 BCE	14C (corrected)	No data	N	Tephra layer KB
VEI 4: improbably correlations based on tectonic settings
Vesuvius	Italy	Post-subduction	203 CE	Historical Observations	No data	536 CE	On basis of tectonic setting and data from other eruptions, geochemical correlation improbable
Wrangell	Alaska	Intraplate	190±200 CE	14C (uncorrected)	No data	N	On basis of tectonic setting, geochemical match improbable
Sete Cidades	Azores	Intraplate	90±100 CE	14C (uncorrected)	No data	670±150 CE	Azores tephras range from trachyte (alkalis ~12 wt%) to trachybasalt; on basis of intraplate setting, geochemical correlation improbable
Rungwe	East Africa	Divergent boundary	50±100 BCE	14C (corrected)	No data	N	On basis of tectonic setting, geochemical correlation improbable
Misti, El	Peru	Active arc	80±75 BCE	14C (corrected)	Andesitic to rhyolitic	N	High Al2O3 wt% (Legros, 2001); no geochemical correlation
Tenerife	Canary Islands	Intraplate	80±40 BCE	14C (corrected)	No data	N	On basis of intraplate setting, geochemical correlation improbable
VEI <4: Iceland
Katla [VEI 3]	Eastern volcanic zone	Intraplate	270±12 CE	Radiocarbon (uncorrected)	Basaltic to dacitic	Several (VEI not stated)	non-basaltic component = SILK-Yn (Larsen et al., 2001; Dugmore et al., 2000); no geochemical correlation
Snaefellsjökull [VEI not stated]	Snæfellsnes Volcanic Zone	Intraplate	130-220 CE	14C corrected (Larsen et al., 2002)	Trachydacitic to rhyolitic	N	Sn-1 (Larsen et al. 2001); no geochemical correlation
Torfajökull [VEI 3]	Eastern volcanic zone	Intraplate	150±100 CE	Tephrochronology	Rhyolitic	N	Grákolla tephra (Óladóttir et al., 2011); no geochemical correlation
Askja [not in GVP]	Eastern volcanic zone	Intraplate	260-16 BCE	Bayesian 14C (Barber et al., 2008)	Dacitic to rhyolitic	N	A-2000 or Glen Garry (Barber et al., 2008); no geochemical correlation

## Sheet: Comparative major element data
	n		SiO2	TiO2	Al2O3	FeOtotal	MnO	MgO	CaO	Na2O	K2O	P2O5	Cl	Anal. total	Notes, references
QUB-1832/3	16	Mean	59.66	1.10812	16.165	7.81125	0.166875	2.6625	6.21687	4.31687	1.69625	0.23	0.13875	97.71	This paper
		SD	1.03073	0.0999479	0.213822	0.375249	0.0881452	0.201511	0.374713	0.37631	0.149794	0.0716473	0.0342296	1.99
VEI 6
Churchill (Alaska) 325±65 CE	201	Mean	74.3584	0.202626	14.2222	1.45593	0.0583746	1.72956	0.318428	4.17398	3.15049	-	0.323053	97.29	WRAn: Preece et al., 2014
		SD	1.82068	0.102058	0.899856	0.300417	0.0407107	0.484672	0.115475	0.304748	0.232053		0.0736686	1.83191
Ksudach (Kamchatka) 245-360 CE	27	Mean	72.9385	0.387778	14.2641	2.56481	0.157778	0.430741	2.33185	5.36815	1.31259	0.0785185	0.161852	97.59	LB726 & OB 383-388: Plunkett et al., 2015
		SD	1.89921	0.0774266	1.27549	0.509678	0.061976	0.125389	0.573076	0.675597	0.172774	0.0495909	0.0307642	1.49
Taupo (New Zealand) 232±5 CE	10	Mean	76.58	0.22	12.9	1.75	-	0.22	1.41	3.77	2.99	-	0.16	not stated	WS2: Newnham et al., 1995
		SD	1.1	0.05	0.46	0.32		0.07	0.27	0.35	0.39		0.03
Ambrym (Vanuatu) 50±100 CE	137		SiO2 means centre on 50 wt%, 54 wt% and 66 wt %												Robin et al., 1993
Okmok (Alaska) 43 BCE	26	Mean	58.0271	1.45175	15.3889	9.73657	0.215092	2.80441	6.38976	3.84231	1.67708	0.341999	0.124635	96.94	Andesitic component; McConnell et al., 2020
		SD	1.19218	0.181581	0.294352	0.904525	0.0670803	0.346499	0.508393	0.325641	0.174459	0.0702455	0.0249249	1.47
Apoyeque (Nicaragua) 50±100 BCE	-		73.13	0.33	14.47	2.35	-	0.52	2.38	4.3	2.53	-	-	99.82	Chiltepe tephra (averaged means of several datasets): Kutterolf et al., 2008
VEI 5
Masaya Tuff (Nicaragua) 150±? CE		Mean	54.003	1.30751	15.244	12.2771		3.87888	8.43831	3.32239	1.52879	99.4267	-	99.49	Averaged means of three datasets: Kutterolf et al., 2008
Furnas (Azores) 80±100 CE	26	Mean	64.803	0.407063	17.1024	3.0304	0.23181	0.205319	0.751691	7.87142	5.54421	0.0526488		99.1379	Furnas C: Wastegård et al., 2020
		SD	0.549272	0.0282483	0.479385	0.19083	0.0359448	0.0336484	0.0797157	0.478362	0.190637	0.0255568		1.33958
Vesuvius (Italy) 79 CE	373	Mean	55.6805	0.314899	22.0262	3.03041	0.0834012	0.133328	4.12751	7.30944	7.30414	-	-	not stated	Pompeii: Santacroce et al., 2008
		SD	1.38257	0.138759	1.15647	0.878037	0.0819322	0.23034	0.997998	1.65059	1.47625
VEI 4
Shiveluch (Kamchatka) ~320 CE	13	Mean	75.8349	0.228707	13.5668	1.177	0.0457912	0.284393	1.21339	4.67884	2.80966	0.0251753	0.119881	98.0819	Unit 18: Ponomareva et al., 2015
		SD	0.167732	0.0934155	0.116865	0.0928142	0.0402817	0.0330237	0.0690047	0.111126	0.0476211	0.0256006	0.0155919	1.37354
Shiveluch (Kamchatka) ~100 CE	21	Mean	76.3164	0.232409	13.3695	1.10293	0.0224125	0.247508	1.18448	4.41385	2.93736	0.0292236	0.108384	97.3055	Unit 21 (SH5): Ponomareva et al., 2015
		SD	0.217675	0.021761	0.181284	0.232998	0.0204629	0.0249255	0.0639562	0.12576	0.0841784	0.0185185	0.00929196
Glacier Peak (Wa, USA) 200±50 CE	36	Mean	77.53	0.36	12.12	1.35		0.14	0.77	3.38	4.14		0.08	97.89	CYI and CYII: Foit et al., 2004
		SD	0.61	0.09	0.35	0.31		0.08	0.28	0.33	0.59		0.03	1.72
Tacaná (Mexico) 70±100 CE	Bulk		61.24	0.59	16.94	6.11*	0.11	2.45	5.74	3.77	2.17	0.15	-	-	ICP-analysis of glassy lithic (Macias et al., 2000); *Fe2O3
Pelée (Martinique) 79±21 BCE	5	Mean	72.94	-	14.15	2.92	0.59	-	3.08	4.27	1.7	-	-	not stated	P3: Martel and Poussineau, 2007
		SD	0.22		0.21	0.23	0.03		0.09	0.24	0.08
Cotopaxi 70±150 CE (Ecuador)	3	Mean	63.835	0.915127	17.3448	6.09047	0.144898	2.2478	5.24028	1.96813	2.18914			98.73	CTX-25 (KA1): Garrison et al., 2011
		SD	0.246558	0.0218727	0.109767	0.0130115	0.0770509	0.132017	0.228088	0.164725	0.331207
Merapi (Indonesia) 20±300 BCE	5	Mean	75.8	0.3	11.5	0.8	0	0.2	0.7	3.3	4.4	-	-	-	NB Data not normalised; Andreastuti, 1999
		SD	4.1	0.2	0.2	0.7	0	0.3	0.4	1.2	0.8	-
El Misti (Peru) 80±75 BCE			63.6153	0.7065	16.6431	5.02624	0.111021	2.01857	4.54178	5.04643	2.29108	-		99.08	A15 DG (Legros 2001)
Iceland VEI<4
Katla 270±12 CE [VEI 3]	20	Mean	67.1598	1.14857	14.2744	5.99661	0.189078	1.04766	3.05093	4.29982	2.83319			97.5965	SILK-Yn (Dugmore et al., 2000)
		SD	0.859409	0.0965119	0.185599	0.33801	0.0294977	0.152184	0.299013	0.205681	0.158963			0.824202
Askja 260-16 BCE	189	Mean	73.452	0.637781	12.9765	4.30988	0.117293	0.555296	2.63856	3.295	2.00107			97.1163	Glen Garry (Barber et al., 2008)
		SD	1.83659	0.168602	0.306556	0.747967	0.0558953	0.264405	0.554745	0.535332	0.222284			1.14008
Snaefellsjökull	6	Mean	67.9728	0.383993	15.8523	4.11953	0.328405	1.74196	5.12642	4.40548	0.0691066			98.9583	Sn-1 (Larsen et al., 2001)
		SD	0.980403	0.0352425	0.381706	0.422675	0.123679	0.358231	0.183348	0.220754	0.0943613			0.669699
Torfajökull	41	Mean	71.1303	0.291532	15.1492	2.77778	0.104629	0.281942	1.0603	4.59161	4.57365	0.044418		99.5168	Grákolla tephra (Óladóttir et al., 2011)
		SD	1.47254	0.110659	0.181014	1.07429	0.0725755	0.192539	0.591564	0.476199	0.462231	0.0746976		0.740456
